# Supplementary material for: Medication Use before, during, and after Pregnancy among Women with Eating Disorders: A Study from the Norwegian Mother and Child Cohort Study
Source: PLOS journal article supplement (doi:10.1371/journal.pone.0133045), 2015-07-22
Supplement: S4 (10.1371/journal.pone.0133045.s004) [file journal.pone.0133045.s004]

| Psychotropic medication group      | AN<br>(n=54)<br><i>n (%)</i> | BN<br>(n=585)<br><i>n (%)</i> | EDNOS-P<br>(n=61)<br><i>n (%)</i> | BED<br>(n=3104)<br><i>n (%)</i> | No ED<br>(n=58215)<br><i>n (%)</i> |
|------------------------------------|------------------------------|-------------------------------|-----------------------------------|---------------------------------|------------------------------------|
| <b>Antidepressants</b>             |                              |                               |                                   |                                 |                                    |
| Before pregnancy                   | <b>9 (16.7)<sup>*</sup></b>  | <b>46 (7.9)<sup>*</sup></b>   | <b>6 (9.8)<sup>‡</sup></b>        | <b>156 (5.0)<sup>*</sup></b>    | 1474 (2.5)                         |
| First trimester                    | <b>5 (9.3)<sup>*</sup></b>   | <b>24 (4.1)<sup>*</sup></b>   | <b>5 (8.2)<sup>*</sup></b>        | <b>66 (2.1)<sup>*</sup></b>     | 469 (0.8)                          |
| Second trimester                   | <b>3 (5.6)<sup>‡</sup></b>   | <b>15 (2.6)<sup>*</sup></b>   | <b>3 (4.9)<sup>‡</sup></b>        | <b>33 (1.1)<sup>*</sup></b>     | 254 (0.4)                          |
| Third trimester                    | 1 (1.9)                      | <b>9 (1.5)<sup>*</sup></b>    | 2 (3.3)                           | <b>28 (0.9)<sup>*</sup></b>     | 185 (0.3)                          |
| Any time during pregnancy          | <b>7 (13.0)<sup>*</sup></b>  | <b>33 (5.6)<sup>*</sup></b>   | <b>5 (8.2)<sup>*</sup></b>        | <b>86 (2.8)<sup>*</sup></b>     | 586 (1.0)                          |
| 0-3 months postpartum              | -                            | <b>9 (1.5)<sup>*</sup></b>    | 1 (1.6)                           | <b>25 (0.8)<sup>*</sup></b>     | 236 (0.4)                          |
| 4-6 months postpartum              | 2 (3.7)                      | <b>13 (2.2)<sup>*</sup></b>   | 2 (3.3)                           | <b>35 (1.1)<sup>*</sup></b>     | 359 (0.6)                          |
| Before, during and after pregnancy | 1 (1.9)                      | <b>7 (1.2)<sup>*</sup></b>    | 1 (1.6)                           | <b>17 (0.5)<sup>‡</sup></b>     | 159 (0.3)                          |
| <b>Anxiolytics and sedatives</b>   |                              |                               |                                   |                                 |                                    |
| Before pregnancy                   | <b>5 (9.3)<sup>*</sup></b>   | <b>21 (3.6)<sup>*</sup></b>   | 1 (1.6)                           | 34 (1.1)                        | 572 (1.0)                          |
| First trimester                    | 1 (1.9)                      | <b>11 (1.9)<sup>*</sup></b>   | -                                 | 16 (0.5)                        | 257 (0.4)                          |
| Second trimester                   | -                            | <b>8 (1.4)<sup>‡</sup></b>    | 1 (1.6)                           | 17 (0.5)                        | 207 (0.4)                          |
| Third trimester                    | -                            | <b>6 (1.0)<sup>‡</sup></b>    | 1 (1.6)                           | <b>19 (0.6)<sup>*</sup></b>     | 160 (0.3)                          |
| Any time during pregnancy          | 1 (1.9)                      | <b>23 (3.9)<sup>*</sup></b>   | 2 (3.3)                           | <b>46 (1.5)<sup>*</sup></b>     | 494 (0.8)                          |
| 0-3 months postpartum              | 1 (1.9)                      | 2 (0.3)                       | 1 (1.6)                           | 20 (0.6)                        | 218 (0.4)                          |
| 4-6 months postpartum              | <b>3 (5.6)<sup>‡</sup></b>   | 7 (1.2)                       | <b>3 (4.9)<sup>‡</sup></b>        | 22 (0.7)                        | 257 (0.4)                          |
| Before, during and after pregnancy | 1 (1.9)                      | -                             | -                                 | 3 (0.1)                         | 44 (0.1)                           |
| <b>Antipsychotics</b>              |                              |                               |                                   |                                 |                                    |
| Before pregnancy                   | 1 (1.9)                      | <b>5 (0.9)<sup>‡</sup></b>    | 1 (1.6)                           | 9 (0.3)                         | 137 (0.2)                          |
| First trimester                    | 1 (1.9)                      | <b>9 (1.5)<sup>‡</sup></b>    | -                                 | 19 (0.6)                        | 344 (0.6)                          |
| Second trimester                   | -                            | 7 (1.2)                       | -                                 | 13 (0.4)                        | 294 (0.5)                          |

|                                    |         |                             |   |          |           |
|------------------------------------|---------|-----------------------------|---|----------|-----------|
| Third trimester                    | 1 (1.9) | 1 (0.2)                     | - | 4 (0.1)  | 79 (0.1)  |
| Any time during pregnancy          | 2 (3.7) | <b>12 (2.1)<sup>‡</sup></b> | - | 24 (0.8) | 481 (0.8) |
| 0-3 months postpartum              | 1 (1.9) | 1 (0.2)                     | - | 4 (0.1)  | 51 (0.1)  |
| 4-6 months postpartum              | 1 (1.9) | 2 (0.3)                     | - | 3 (0.1)  | 60 (0.1)  |
| Before, during and after pregnancy | -       | 1 (0.2)                     | - | -        | 18 (0.03) |

---
